# Supplementary material
Source: publisher figshare collection journal article supplement (https://adisjournals.figshare.com/articles/dataset/_/13614314)
Supplement: Supplementary file 1 [file 2]

## Texte pour la vidéo de l'article

Berruyer M, and Delaunay, J. Atopic dermatitis: a patient and dermatologist's perspective. *Dermatology and Therapy*. 2021. 10.1007/s13555-021-00497-w.

**472 mots**

[Montrer la diapositive 1]

**Je m'appelle Juliette Delaunay** ; je suis dermatologue au CHU d'Angers, en France. J'ai le plaisir de cosigner cet article avec ma patiente Mylene Berruyer.

**Le tableau clinique de Mme Berruyer est tout à fait typique de la dermatite atopique.** Elle décrit dans l'article comment la gêne provoquée par les lésions sur son visage et ses mains a impacté ses activités quotidiennes et son sommeil. Le parcours de Mme Berruyer est classique : la patiente consulte depuis l'enfance auprès de nombreux médecins généralistes et spécialistes, obtient le même traitement sans explications claires. Elle évoque les différents traitements qu'elle a essayés -mais aussi l'automédication et l'hypnose- et exprime sa frustration en constatant que l'eczéma revient dès qu'elle arrête le traitement. Lorsqu'elle m'a finalement consulté, sa maladie évoluait depuis de nombreuses années.

**La dermatite atopique** est une maladie chronique dont la physiopathologie complexe repose sur deux piliers : l'altération de la barrière cutanée et la perturbation du système immunitaire inné et adaptatif. Les signes et les symptômes sont très variables, sources de souffrances.

**Lorsque j'ai reçu Mme Berruyer pour la première fois en consultation,** elle présentait une dermatite atopique sévère. Les corticostéroïdes topiques n'étaient manifestement pas efficaces, bien que correctement appliqué et je lui ai donc prescrit un traitement systémique par ciclosporine afin de l'améliorer rapidement. Elle a très bien répondu à ce traitement : 75% de régression des lésions en un mois et une amélioration spectaculaire de sa qualité de vie et de son humeur. La prochaine étape consistera à diminuer progressivement la ciclosporine, en raison de l'apparition d'une toxicité rénale, et à introduire le dupilumab pour une action à long terme.

[Afficher l'encadré 1]

**Lors des discussions avec Mme Berruyer pour la préparation de cet article,** une des leçons tirées est l'importance de la relation patient-médecin dans la réussite de la prise en charge de la dermatite atopique. Le médecin doit être empathique, créer une relation de confiance et comprendre les attentes du patient et ses objectifs de traitement ; il convient d'adapter le traitement aux comorbidités comme aux préférences du patient et à son mode de vie.

Je prends toujours le temps d'informer un nouveau patient sur la physiopathologie de la dermatite atopique et de lui expliquer les modalités des soins locaux, comment appliquer les crèmes en bonne quantité et optimiser leur effet. Je crois que l'éducation thérapeutique des

patients -au moyen de vidéos, d'ateliers par exemple- devrait toujours être un complément à la thérapie conventionnelle.

[Fermer l'encadré 1]

**Pour résumer**, cet article décrit un patient présentant un tableau clinique assez fréquent de la dermatite atopique chez l'adulte. Si la prise en charge est inadaptée, ces patients peuvent sortir du réseau de soin et envisager des médecines alternatives. Les réintégrer dans un réseau de soin est une priorité car ces patients peuvent bénéficier des nouvelles thérapies systémiques de cette maladie chronique.
